# Supplementary material for: Epigenetic and Transcriptome Profiling Identifies a Population of Visceral Adipose-Derived Progenitor Cells with the Potential to Differentiate into an Endocrine Pancreatic Lineage
Source: PubMed Central journal article supplement — Cell Transplant. 2018 Oct 30;28(1):89–104. doi: 10.1177/0963689718808472 (PMC6322142; doi:10.1177/0963689718808472), 2018-10-30
Supplement: 808472_Supplementary_Table_1_new.pdf [file 808472_Supplementary_Table_1_new.pdf]

Supplementary Table 1: Combinations of small molecules for mouse differentiation experiments

| Experimental condition | Small molecule source and working concentration | Biological relevance to differentiation protocol (references)                                                                                                                                                                             |
|------------------------|-------------------------------------------------|-------------------------------------------------------------------------------------------------------------------------------------------------------------------------------------------------------------------------------------------|
| 01                     | 100mM sodium butyrate (Sigma)                   | Inhibits histone deacetylase (HDAC) activity, resulting in a state of histone hyperacetylation that alters chromatin structure and function, which can have various effects on gene expression and cell differentiation <sup>56; 57</sup> |
| 02                     | 100mM nicotinamide (Sigma)                      | Has been shown to induce pancreatic differentiation and increase proinsulin biosynthesis in islets <sup>58</sup> , and increase the mitotic index of $\beta$ -cells after pancreatectomy <sup>59-61</sup>                                 |
| 03                     | 500ng.mL <sup>-1</sup> activin A (Sigma)        | A member of the transforming growth factor beta (TGF- $\beta$ ) superfamily that activates Smad2-mediated intracellular signaling to contribute to specificity of definitive endoderm in embryonic stem cells in culture <sup>62</sup>    |
| 04                     | 500ng.mL <sup>-1</sup> FGF2 (Sigma)             | Involved in many biological processes including angiogenesis, embryonic                                                                                                                                                                   |

|    |                                   |                                                                                                                                                                                                                                                                                                                 |
|----|-----------------------------------|-----------------------------------------------------------------------------------------------------------------------------------------------------------------------------------------------------------------------------------------------------------------------------------------------------------------|
|    |                                   | development, and wound healing. It has shown to promote the differentiation of adipose-derived cells <sup>42</sup> and loss of FGF signaling has been implicated in $\beta$ -cell loss and the development of diabetes <sup>43</sup>                                                                            |
| 05 | 100 $\mu$ M 5-azacitidine (Sigma) | Inhibits DNA methyltransferase activity which results in a state of DNA hypomethylation, which results in a non-specific increase in gene expression. This increased gene expression has been shown to promote the acquisition of a differentiated gene signature in mesenchymal cell populations <sup>63</sup> |
| 06 | 1 $\mu$ M exendin-4 (Sigma)       | Glucagon-Like Peptide-1 (GLP-1) receptor agonist that promotes the differentiation of pancreatic progenitor populations (such as ductal progenitor cells), and increases proliferation and maturation in beta cells during development <sup>47; 48</sup>                                                        |
| 07 | 1 $\mu$ M exendin-(9-39) (Sigma)  | A truncated version of exendin-4 that acts as a potent competitive antagonist at the GLP-1 receptor <sup>49; 50</sup>                                                                                                                                                                                           |

Supplementary Table 2: TaqMan quantitative real time PCR assays and antibodies used in this study.

| Product                                                  | Manufacturer       | Catalogue Number |
|----------------------------------------------------------|--------------------|------------------|
| <b>20X AOD probe/primer mix</b>                          |                    |                  |
| 18s – 18S ribosomal RNA                                  | Applied Biosystems | Hs99999901_s1    |
| ACAN – aggrecan                                          | Applied Biosystems | Hs00153936_m1    |
| ADIPOQ – adiponectin, C1Q and collagen domain containing | Applied Biosystems | Hs00605917_M1    |
| ADIPOR1 – adiponectin receptor 1                         | Applied Biosystems | Hs01114951_m1    |
| ADIPOR2 – adiponectin receptor 2                         | Applied Biosystems | Hs00226105_m1    |
| ADRB1 – adrenoceptor beta 1                              | Applied Biosystems | Hs02330048_s1    |
| BGLAP – bone gamma-carboxyglutamate (gla) protein        | Applied Biosystems | Hs01587814_g1    |
| CD44 – CD44 molecule (Indian blood group)                | Applied Biosystems | Hs01075861_m1    |
| CFD – complement factor D (adipsin)                      | Applied Biosystems | Hs00157263_m1    |
| CLDN4 – claudin 4                                        | Applied Biosystems | Hs00533616_s1    |
| DLK1 – delta-like 1 homolog (Drosophila)                 | Applied Biosystems | Hs00171584_m1    |
| FGF2 – fibroblast growth factor 2 (basic)                | Applied Biosystems | Hs00266645_m1    |
| FN1 – fibronectin 1                                      | Applied Biosystems | Hs00365052_m1    |
| FOXA1 – forkhead box A1                                  | Applied Biosystems | Hs00270129_m1    |
| GAPDH – glyceraldehyde-3-phosphate dehydrogenase (Human) | Applied Biosystems | Hs99999905_m1    |
| Gapdh – glyceraldehyde-3-phosphate dehydrogenase (Mouse) | Applied Biosystems | Mm03302249_g1    |
| GCG – glucagon                                           | Applied Biosystems | Hs00174967_m1    |
| GCK - glucokinase                                        | Applied Biosystems | Hs01564555_m1    |
| Glut 1 – Glucose Transporter 1                           | Applied Biosystems | Hs00892681_m1    |
| Glut 2 - Glucose Transporter 2                           | Applied Biosystems | Hs00165775_m1    |
| HES1 – hairy and enhancer of split 1, (Drosophila)       | Applied Biosystems | Hs00172878_m1    |
| INS – insulin                                            | Applied Biosystems | Hs00355773_m1    |
| Ins1 – insulin 1 (Mouse)                                 | Applied Biosystems | Mm01950294_s1    |
| Ins2 – insulin 2 (Mouse)                                 | Applied Biosystems | Mm00731595_gH    |

|                                                                 |                    |               |
|-----------------------------------------------------------------|--------------------|---------------|
| INSR – insulin receptor                                         | Applied Biosystems | Hs00961554_m1 |
| ITGA6 – integrin, alpha 6                                       | Applied Biosystems | Hs01041011_m1 |
| ITGAV – integrin, alpha V                                       | Applied Biosystems | Hs00233808_m1 |
| LEP – leptin                                                    | Applied Biosystems | Hs00174877_M1 |
| MAFA – v-maf musculoaponeurotic fibrosarcoma oncogene homolog A | Applied Biosystems | Hs01651425_s1 |
| MYC – v-myc myelocytomatosis viral oncogene homolog             | Applied Biosystems | Hs00153408_m1 |
| NANOG – nanog homeobox                                          | Applied Biosystems | Hs02387400_g1 |
| NGN3 – neurogenin 3                                             | Applied Biosystems | Hs00360700_g1 |
| PDX1 – pancreatic and duodenal homeobox 1                       | Applied Biosystems | Hs00236830_m1 |
| Pdx1 – pancreatic and duodenal homeobox 1 (Mouse)               | Applied Biosystems | Mm00435565_m1 |
| POU5F1 – POU class 5 homeobox 1                                 | Applied Biosystems | Hs00999632_g1 |
| PPARA – peroxisome proliferator-activated receptor alpha        | Applied Biosystems | Hs00947539_m1 |
| PPARG – peroxisome proliferator-activated receptor gamma        | Applied Biosystems | Hs01115513_m1 |
| SMAD2 – SMAD family member 2                                    | Applied Biosystems | Hs00183425_m1 |
| SMAD3 – SMAD family member 3                                    | Applied Biosystems | Hs00969210_m1 |
| SMA – Smooth muscle actin                                       | Applied Biosystems | Hs00426835_g1 |
| SNAI1 – snail homolog 1 (Drosophila)                            | Applied Biosystems | Hs00195591_m1 |
| SOX1 – SRY (sex determining region Y)-box 1                     | Applied Biosystems | Hs01057642_s1 |
| SOX17 – SRY (sex determining region Y)-box 17                   | Applied Biosystems | Hs00751752_s1 |
| SOX2 – SRY (sex determining region Y)-box 2                     | Applied Biosystems | Hs00415716_m1 |
| SOX7 – SRY (sex determining region Y)-box 7                     | Applied Biosystems | Hs00846731_s1 |
| SST – somatostatin                                              | Applied Biosystems | Hs00174949_m1 |
| Sst – somatostatin (Mouse)                                      | Applied Biosystems | Mm00436671_m1 |
| TERT – telomerase reverse transcriptase                         | Applied Biosystems | Hs00972656_m1 |
| THY1 – Thy-1 cell surface antigen                               | Applied Biosystems | Hs00264235_s1 |
| VIM – vimentin                                                  | Applied Biosystems | Hs00185584_m1 |
| Visfatin                                                        | Applied Biosystems | Hs00237184_M1 |
| WNT3A – wingless-related MMTV integration site 3A               | Applied Biosystems | Hs00263977_m1 |
|                                                                 |                    |               |

|                                                    |                  |            |
|----------------------------------------------------|------------------|------------|
| <b>ChIP Antibodies</b>                             |                  |            |
| Anti-dimethyl Histone H3 (Lys4) Antibody           | Millipore        | 05-684     |
| Anti-dimethyl-Histone H3 (Lys9) Antibody           | Millipore        | 07-441     |
| Anti-acetyl-Histone H3 Antibody                    | Millipore        | 06-599     |
| Normal rabbit IgG                                  | Millipore        | NI01-100UG |
|                                                    |                  |            |
| <b>Flow cytometry antibodies</b>                   |                  |            |
| CD29 PE-conjugated anti-human for flow cytometry   | BD Biosciences   | 555443     |
| CD31 FITC-conjugated anti-human for flow cytometry | BD Biosciences   | 555445     |
| CD34 FITC-conjugated anti-human for flow cytometry | BD Biosciences   | 555821     |
| CD44 PE-conjugated anti-human for flow cytometry   | BD Biosciences   | 550989     |
| CD45 FITC-conjugated anti-human for flow cytometry | BD Biosciences   | 555488     |
| CD73 FITC-conjugated anti-human for flow cytometry | BD Biosciences   | 561254     |
| CD90 PE-conjugated anti-human for flow cytometry   | BD Biosciences   | 562385     |
| CD105 PE-conjugated anti-human for flow cytometry  | BD Biosciences   | 560839     |
|                                                    |                  |            |
| <b>Immunocytochemistry primary antibodies</b>      |                  |            |
| Human STRO-1 MAb (Clone STRO-1), Mouse IgM         | R&D Systems      | MAB1038    |
| Leptin Polyclonal Antibody                         | Pierce           | PA1-051    |
| Monoclonal Mouse Anti-Vimentin, Clone V9           | Dako             | M0725      |
| Polyclonal Guinea Pig Anti-Insulin                 | Dako             | A0564      |
| Rabbit Anti PPAR Gamma, Polyclonal IgG             | Ab Serotec       | AHP1461    |
|                                                    |                  |            |
| <b>Immunocytochemistry secondary antibodies</b>    |                  |            |
| Alexa Fluor® 488 goat anti-guinea pig IgG (H+L)    | Molecular Probes | A-11073    |
| Alexa Fluor® 488 goat anti-rabbit IgG (H+L)        | Molecular Probes | A-11070    |
| Alexa Fluor® 546 goat anti-mouse IgG (H+L)         | Molecular Probes | A-11018    |
|                                                    |                  |            |
|                                                    |                  |            |

## References

56. Candido EP, Reeves R, Davie JR. Sodium butyrate inhibits histone deacetylation in cultured cells. *Cell*. 1978;14(1): 105–113.
57. Davie JR. Inhibition of histone deacetylase activity by butyrate. *J Nutr*. 2003;133(suppl 7):2485S–2493 S.
58. Otonkoski T, Beattie GM, Mally MI, Ricordi C, Hayek A. Nicotinamide is a potent inducer of endocrine differentiation in cultured human fetal pancreatic cells. *J Clin Invest*. 1993; 92(3):1459–1466.
59. Van Hoof D, D'Amour KA, German MS. Derivation of insulin-producing cells from human embryonic stem cells. *Stem Cell Res*. 2009;3(2–3):73–87.
60. Sugiyama K, Yonemura Y, Okamoto H. Effects of poly (adribose) synthetase inhibitor on b-cells of a canine pancreas after massive pancreatectomy. *Int J Pancreatol*. 1991;8(1): 85–95.
61. Vaca P, Berna G, Martin F, Soria B. Nicotinamide induces both proliferation and differentiation of embryonic stem cells into insulin-producing cells. *Transplant Proc*. 2003;35(5): 2021–2023.
62. Kubo A, Shinozaki K, Shannon JM, Kouskoff V, Kennedy M, Woo S, Fehling HJ, Keller G. Development of definitive endoderm from embryonic stem cells in culture. *Development*. 2004; 131(7):1651–1662.
63. Rosca AM, Burlacu A. Effect of 5-azacytidine: evidence for alteration of the multipotent ability of mesenchymal stem cells. *Stem Cells Dev*. 2011;20(7):1213–1221.
